# Supplementary material for: Equity Market Fragmentation and Capital Investment Efficiency
Source: Atypon-hosted journal article supplement (doi:10.1287/mnsc.2023.4905), 2023-09-01
Supplement: mnsc.2023.4905.sm1.pdf [file mnsc.2023.4905.sm1.pdf]

**Online Appendix for  
Equity Market Fragmentation and Capital Investment Efficiency**

**Table A1: Fragmentation and the Sensitivity of Investment to Investment Opportunities**

| <i>Dependent Variable =</i>                      | (1)                      | (2)                   |
|--------------------------------------------------|--------------------------|-----------------------|
|                                                  | <i>CAPX<sub>it</sub></i> |                       |
| <i>Q<sub>t-1</sub></i>                           | 0.459***<br>(16.85)      | 0.633***<br>(8.39)    |
| <i>Q<sub>t-1</sub> × FRAG<sub>t-1</sub></i>      | 0.151**<br>(2.20)        | 0.170**<br>(2.28)     |
| <i>FRAG<sub>t-1</sub></i>                        | -1.984***<br>(-6.09)     | -1.218***<br>(-3.69)  |
| <i>CF<sub>t</sub></i>                            | 0.022***<br>(6.75)       | 0.023***<br>(7.30)    |
| <i>RETURN3<sub>t</sub></i>                       | -0.374***<br>(-13.79)    | -0.327***<br>(-12.02) |
| <i>INVASSETS<sub>t-1</sub></i>                   | 0.006**<br>(2.32)        | 0.004<br>(1.30)       |
| <i>SIZE<sub>t-1</sub></i>                        | -1.567***<br>(-19.58)    | -1.421***<br>(-15.72) |
| <i>MB<sub>t-1</sub></i>                          | 0.018**<br>(2.48)        | 0.057***<br>(6.29)    |
| <i>ROA<sub>t-1</sub></i>                         | 2.257***<br>(9.58)       | 3.128***<br>(10.17)   |
| <i>LEVERAGE<sub>t-1</sub></i>                    | -0.030***<br>(-10.05)    | -0.019***<br>(-4.97)  |
| <i>IDIOVOL<sub>t-1</sub></i>                     | -0.187***<br>(-8.74)     | -0.144***<br>(-5.82)  |
| <i>ANALYST<sub>t-1</sub></i>                     | 0.119**<br>(2.18)        | 0.014<br>(0.20)       |
| <i>INSTOWN<sub>t-1</sub></i>                     | 0.317**<br>(2.09)        | 0.505**<br>(2.57)     |
| <i>TURNOVER<sub>t-1</sub></i>                    | 0.801***<br>(6.62)       | 0.802***<br>(5.03)    |
| <i>NYSE<sub>t</sub></i>                          | 0.510<br>(1.53)          | -0.461<br>(-1.15)     |
| <i>NASDAQ<sub>t</sub></i>                        | 0.309<br>(1.07)          | 0.132<br>(0.39)       |
| <i>Firm characteristics × FRAG<sub>t-1</sub></i> | No                       | Yes                   |
| Firm & Year Fixed Effects                        | Yes                      | Yes                   |
| # Observations                                   | 109,020                  | 109,020               |
| Adjusted R <sup>2</sup>                          | 0.604                    | 0.607                 |

Table A1 reports pooled OLS regression results from the estimation of versions of Equation (2a) that include controls for several firm characteristics that may affect both market fragmentation and the sensitivity of investment to investment opportunities. We include the firm characteristics from Equation (1), both as main effects in Column (1) and interactions with the  $Q_{t-1} \times FRAG_t$  term in Column (2). *CAPX* is capital expenditures as a percentage of total assets.  $Q$  is Tobin's q. *CF* is cash flow from operations as a percentage of total assets. *FRAG* equals one minus the Herfindahl-Hirschman Index measure of the concentration of trading across trading venues during the fiscal year. All other variables are defined in Appendix 1. *t*-statistics based on standard errors clustered by firm are shown in parentheses. \*\*\*, \*\*, and \* denote significance at the 0.01, 0.05, and 0.10 levels, respectively.
